# Supplementary material for: Lipopolysaccharide induces mouse translocator protein (18 kDa) expression via the AP-1 complex in the microglial cell line, BV-2
Source: PLoS One. 2019 Sep 19;14(9):e0222861. doi: 10.1371/journal.pone.0222861 (PMC6752844; doi:10.1371/journal.pone.0222861)
Supplement: S1 Table — Oligonucleotide sequences used for real-time PCR and vector construction; sequencing primers used for the vectors and ChIP assay. (XLSX) [file pone.0222861.s001.xlsx]

## Sheet: S1 Table
S1 Table.	Oligonucleotide sequences used in this study.
for cDNA
Gene Symbol	Official ID	sequence
Tspo	NM_009775	TGGGAGGTTTCACAGAGGAC
		CCAGGTAAGGGTACAGCAAG
Gapdh	NM_008084	AGAACATCATCCCTGCATCCA
	NM_001289726	CCGTTCAGCTCTGGGATGAC
for reporter gene assay
name	Genomic or vector position	sequence
-1518 (full)	-	CGACTAGTGTGCGCCAGAGATGTAT
-1085 (ΔEsrrb)	-	ATTACTAGTTGGATAGGGGCCACAC
-884 (ΔSp1)	-	ATAACTAGTGACAAGGGTACGCCAG
-767 (ΔNf1c)	-	GATACTAGTAATCAGACCGCCTTCG
-517 (ΔAP-1)	-	ATTACTAGTGGTTGAGGGCTGCCAG
-155 (ΔArid3a/FoxP2)	-	CTTACTAGTTGGCATTCGTTGTCTG
+26 reverse primer	-	ATAGGATCCTCCGTGAAGGACACTG
5'-pMCS, sequencing	pMCS (4843 - 4863)	ATAGGCTGTCCCCAGTGCAAG
3'-pMCS, sequencing	pMCS (178 - 159)	GTCAGCATCGAGATCCGTGG
for ChIP assay
Primer name	Genomic position	sequence
mTspo.AP-1 site	-739 bp from TSS	CTGGTTAAGAACAGGAAGCCC
	-460 bp from TSS	AACCGCTTTCTGCCTCTTGTG
mTspo.proximal promoter	-158 bp from TSS	CTGTGGCATTCGTTGTCTGC
	+86 bp from TSS	AGGGTCTCACGTACCCACAG
